# Supplementary material for: Impact of State Stroke Systems of Care Laws on Stroke Outcomes
Source: Healthcare (Basel). 2023 Oct 28;11(21):2842. doi: 10.3390/healthcare11212842 (PMC10648022; doi:10.3390/healthcare11212842)

## SUPPLEMENTAL MATERIALS

**Table S1.** Average difference between actual and predicted outcomes for three percentiles of the distribution of states by number of years of outcome data after first SSOC <sup>a</sup> policy was in effect

|                                                                                   | Time span after first policy |                             |                             |
|-----------------------------------------------------------------------------------|------------------------------|-----------------------------|-----------------------------|
|                                                                                   | Short-term                   | Mid-term                    | Long-term                   |
|                                                                                   | 25 <sup>th</sup> percentile  | 50 <sup>th</sup> percentile | 75 <sup>th</sup> percentile |
| Outcome 1: Proportion of certified PSCs <sup>b</sup>                              | 4                            | 7                           | 9                           |
| Number of years (states) in the percentile                                        | (n=22)                       | (n=12)                      | (n=7)                       |
| Mean difference between observed and actual outcome in percentage points [90% CI] | 2.7<br>[0.4, 3.8] *          | 5.1<br>[2.7, 6.2] *         | 8<br>[5.2, 9.3] *           |
| Model fit to history (probability of a residual more than 2.5% away from zero)    | 0.000 *                      | 0.000 *                     | 0.016 *                     |
| Outcome 2: Brain imaging within 45 minutes of emergency department arrival        | 3 years                      | 4 years                     | 5 years                     |
| Number of years (states) in the percentile                                        | (n=14)                       | (n=11)                      | (n=6)                       |
| Mean difference between observed and actual outcome in percentage points [90% CI] | 3.1<br>[-0.5, 6.2]           | 3.3<br>[-0.4, 6.3]          | 4.7<br>[0.4, 8.4]*          |
| Model fit to history (probability of a residual more than 2.5% away from zero)    | 0.181                        | 0.461                       | 0.363                       |
| Outcome 3: In-hospital costs for stroke patients                                  | 3 years                      | 7 years                     | 9 years                     |
|                                                                                   | (n=22)                       | (n=12)                      | (n=7)                       |

|                                                                                                | Time span after first policy              |                                         |                                          |
|------------------------------------------------------------------------------------------------|-------------------------------------------|-----------------------------------------|------------------------------------------|
|                                                                                                | Short-term<br>25 <sup>th</sup> percentile | Mid-term<br>50 <sup>th</sup> percentile | Long-term<br>75 <sup>th</sup> percentile |
| Number of years (states) in the percentile                                                     |                                           |                                         |                                          |
| Mean difference between observed and actual outcome in dollars [90% CI]                        | -609.90<br>[-1,470.40, -109.60]           | -1,251.70<br>[-1,251.70, -273.80]       | -1,723.5<br>[1,723.5, -573.00]           |
| Model fit to history (probability of a residual more than 2.5% away from zero)                 | 0.055                                     | 0.226                                   | 0.401                                    |
| Outcome 4: In-hospital stroke mortality rate<br><br>Number of years (states) in the percentile | 4 years<br>(n=19)                         | 6 years<br>(n=16)                       | 11 years<br>(n=7)                        |
| Mean difference between observed and actual outcome in deaths per 100 in-patients [90% CI]     | 0.2<br>[0, 0.4]                           | 0.1<br>[-.2, 0.3]                       | -0.5<br>[-.8, -0.2]                      |
| Model fit to history (probability of a residual more than 2.5% away from zero)                 | 0.099                                     | 0.142                                   | 0.205                                    |
| Outcome 5: Age-adjusted stroke mortality<br><br>Number of years (states) in the percentile     | 5 years<br>(n=32)                         | 8 years<br>(n=21)                       | 11 years<br>(n=10)                       |

|                                                                                                | Time span after first policy |                             |                             |
|------------------------------------------------------------------------------------------------|------------------------------|-----------------------------|-----------------------------|
|                                                                                                | Short-term                   | Mid-term                    | Long-term                   |
|                                                                                                | 25 <sup>th</sup> percentile  | 50 <sup>th</sup> percentile | 75 <sup>th</sup> percentile |
| Mean difference between observed and actual outcome in deaths per 100,000 in-patients [90% CI] | -1<br>[-2.2, 0.1]            | -1.4<br>[-2.8, 0.2]         | -1.6<br>[-3.3, 0]           |
| Model fit to history (probability of a residual more than 2.5% away from zero)                 | 0.000                        | 0.000                       | 0.009                       |

<sup>a</sup>: Stroke System of Care; <sup>b</sup>: Primary Stroke Centers; \*There is 90% probability that the effect is positive

**Figure S1. Average estimated effect of SSOC (Stroke System of Care) policies on in-hospital stroke mortality for three percentiles of states.** **A**, 25th percentile includes 19 states with 4 years of observed outcomes after policies were in effect. **B**, 50th percentile includes 16 states with 6 years of observed outcomes after policies were in effect. **C**, 75th percentile includes 7 states with 11 years of observed outcomes after policies were in effect. Year “0” on the x-axis is the year the first SSOC policy was in effect per state. Blue shaded area represents the 90% CI around the estimated effect.  $\text{Pr}(|\text{res}| > 2.5\%)$  indicates the posterior probability of observing a discrepancy that is larger than  $\pm 2.5\%$  between the predicted and observed values. These notations apply to all remaining figures.

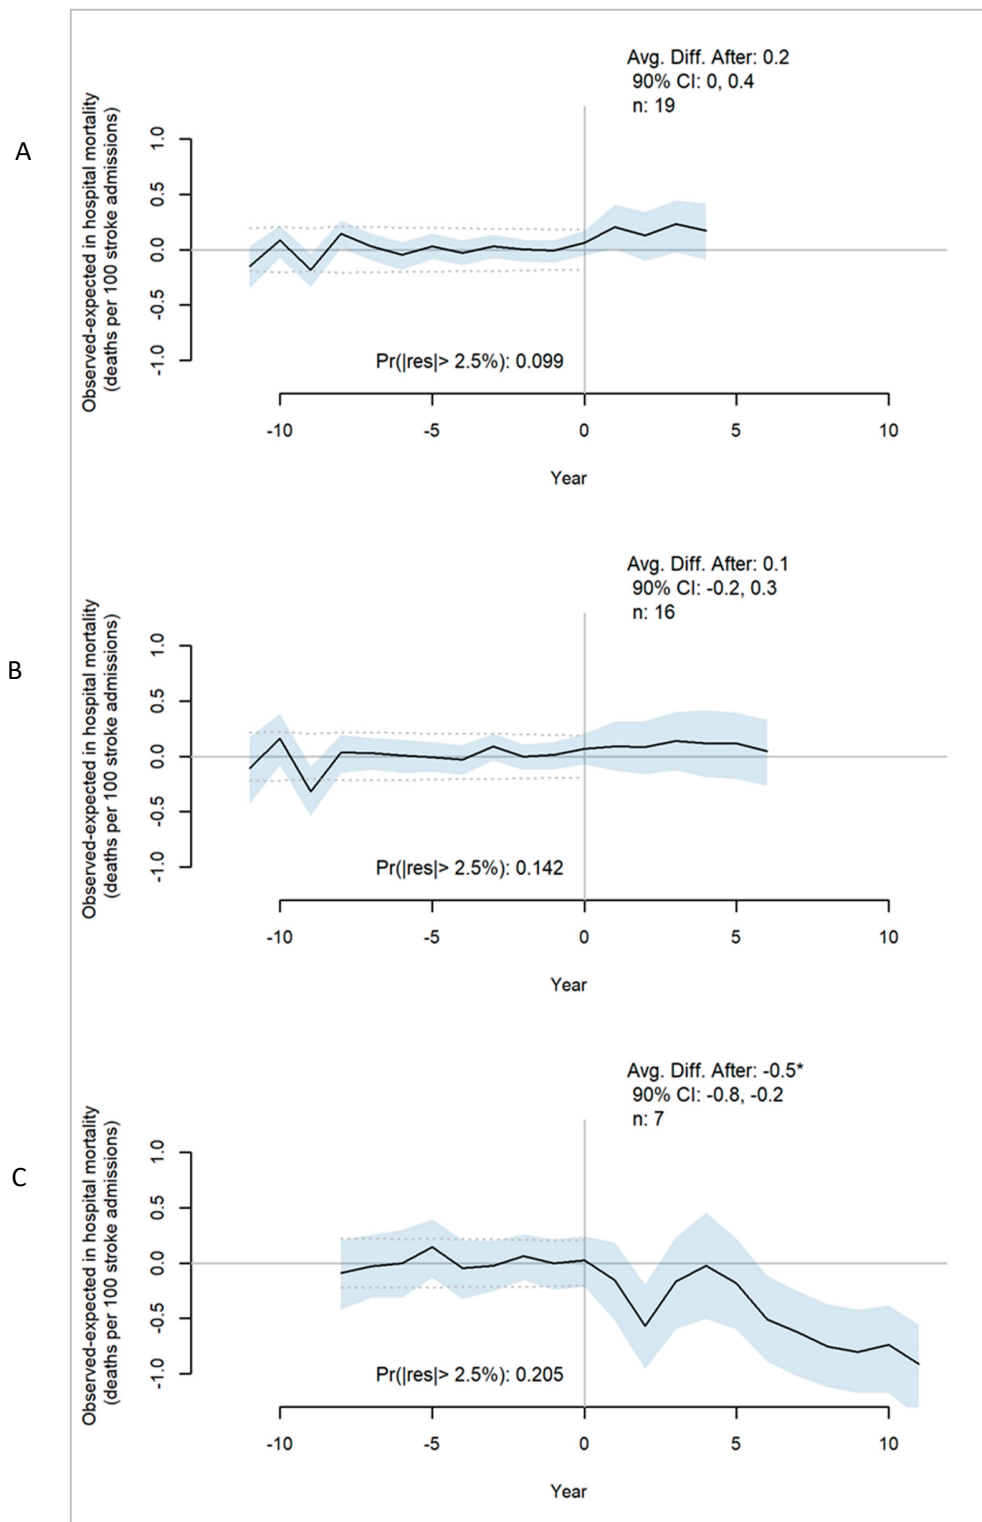

**Figure S2. Average estimated effect of SSOC (Stroke System of Care) policies on absolute difference in stroke mortality between white and non-white populations for three percentiles of states. A, 25th percentile includes 30 states with 5 years of observed outcomes after policies were in effect. B, 50th percentile includes 20 states with 8 years of observed outcomes after policies were in effect. C, 75th percentile includes 10 states with 12 years of observed outcomes after policies were in effect.**

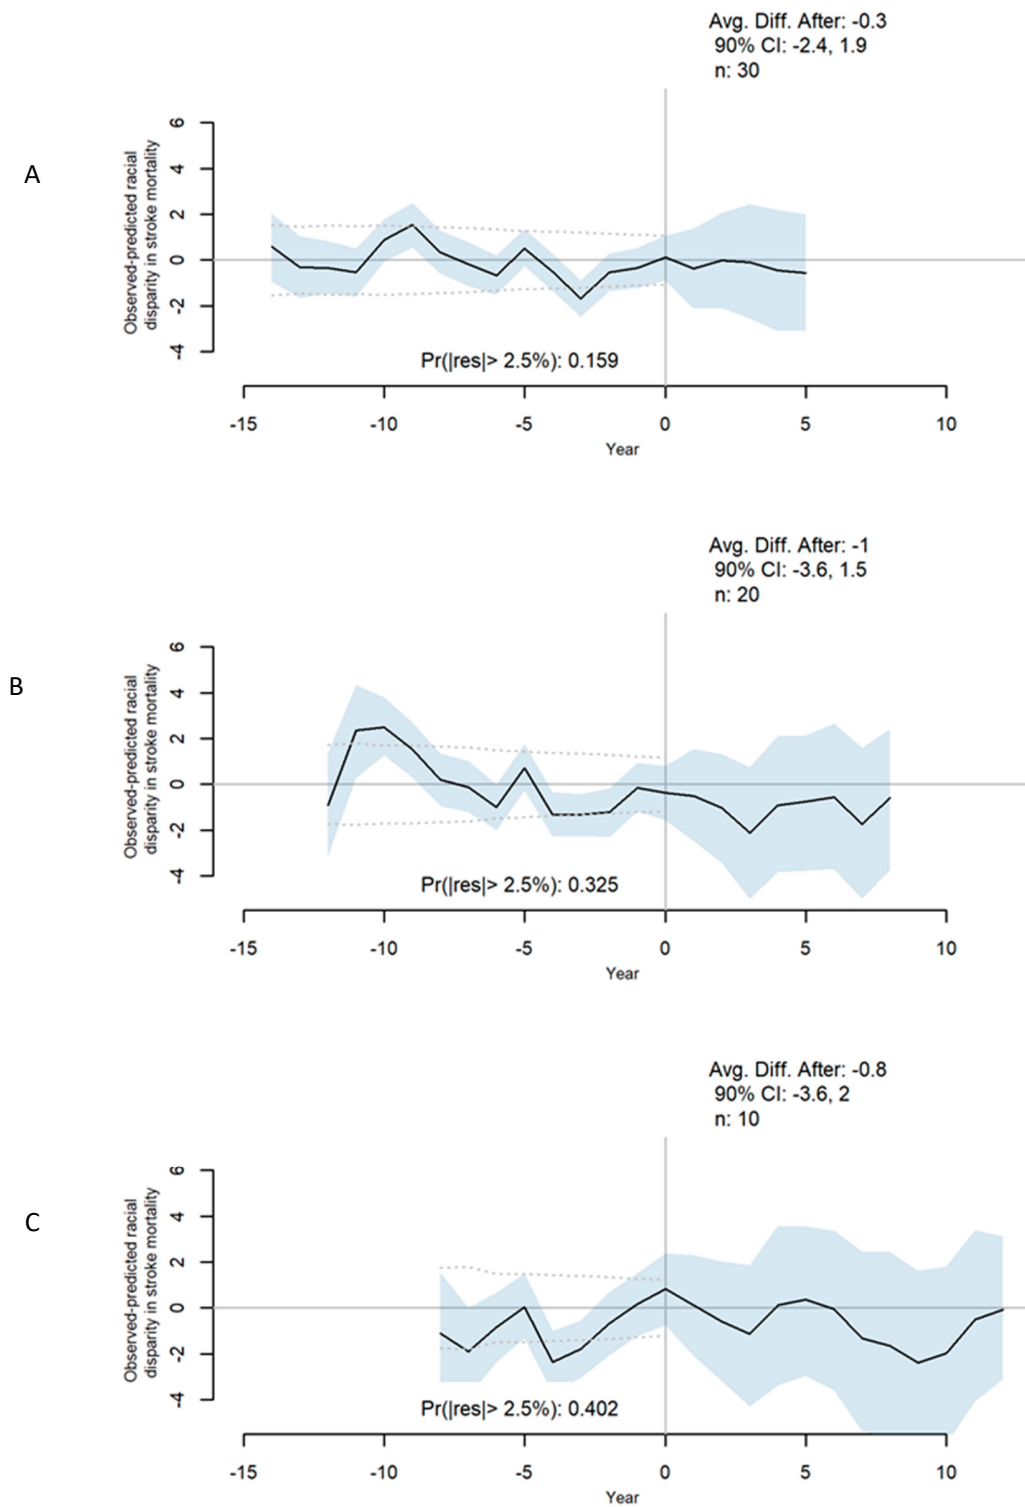

**Figure S3. Average estimated effect of SSOC (Stroke System of Care) policies on absolute difference in stroke mortality between rural and non-rural populations for three percentiles of states. A, 25th percentile includes 29 states with 5 years of observed outcomes after policies were in effect. B, 50th percentile includes 18 states with 8 years of observed outcomes after policies were in effect. C, 75th percentile includes 13 states with 10 years of observed outcomes after policies were in effect.**

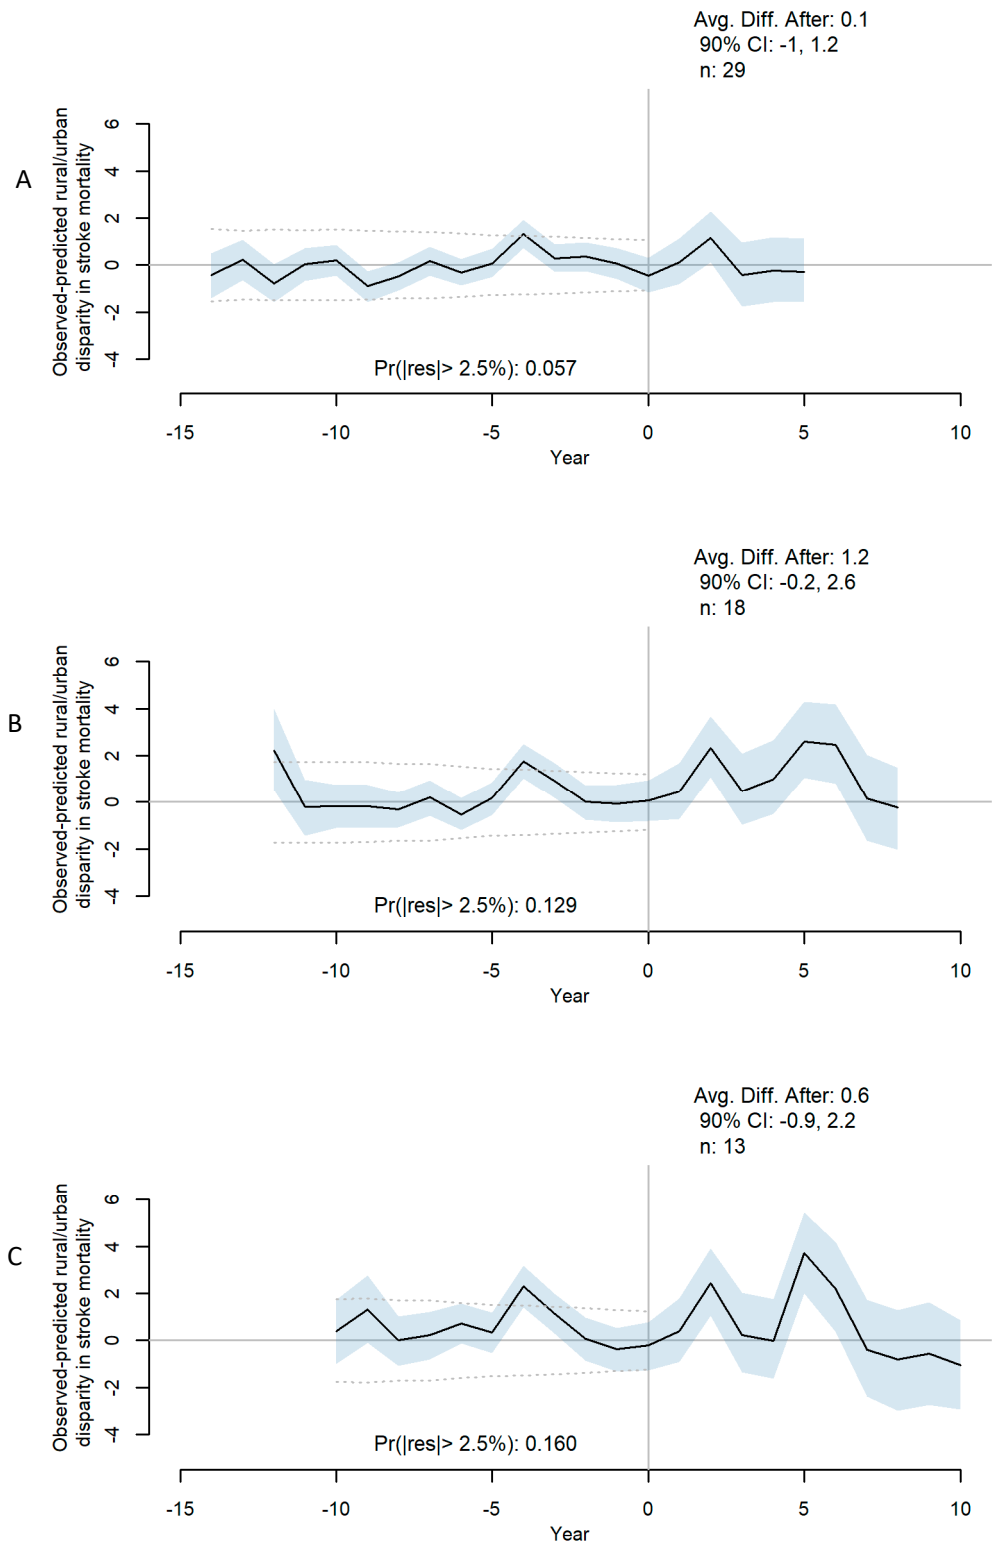

Supplement: Supplementary file 1 [file healthcare-11-02842-s001.zip › healthcare-2588860-supplementary.pdf]
